# Supplementary material for: Synthesis, optical properties and self-assemblies of three novel asymmetrical perylene diimides modified with functional hydrogen bonding groups at bay positions
Source: Royal Society of Chemistry journal article supplement (doi:10.1039/d2nj03624j), 2022-01-01
Supplement: d2nj03624j1.pdf [file d2nj03624j1.pdf]

## Supporting Information

### Synthesis, optical properties and self-assemblies of three novel asymmetrical perylene diimides modified with functioned hydrogen bonding groups at bay positions

Jiayu Tao<sup>a</sup>, Yuchuan Xiao<sup>b</sup>, Lei Sun<sup>a</sup>, Jian Liu<sup>a</sup>, Qingdao Zeng<sup>\*, b, c</sup>, Haijun Xu<sup>\*, a, c</sup>

*a* Jiangsu Co-innovation Center of Efficient Processing and Utilization of Forest Resources, College of Chemical Engineering, Key Laboratory of Forestry Genetics & Biotechnology of Ministry of Education, Nanjing Forestry University, Nanjing 210037, P. R. China.

*b*. CAS Key Laboratory of Standardization and Measurement for Nanotechnology, CAS Center for Excellence in Nanoscience, National Center for Nanoscience and Technology (NCNST), Beijing, 100190 P. R. China.

*c*. Center of Materials Science and Optoelectronics Engineering, University of Chinese Academy of Sciences, Beijing, 100049 P. R. China

*d*. School of Chemistry and Chemical Engineering, Henan Normal University, Xinxiang, 453002, China.

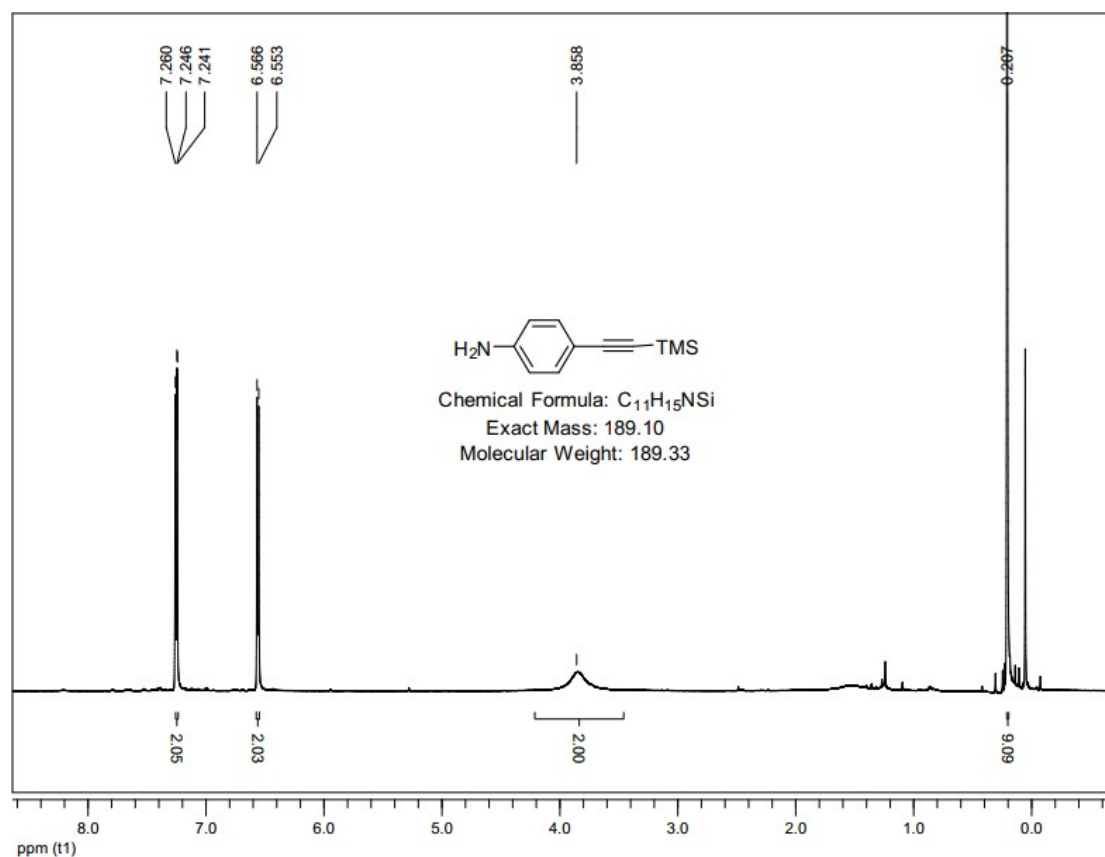

Figure S1 <sup>1</sup>H-NMR spectra of compound 1 (CDCl<sub>3</sub>, 600 M)

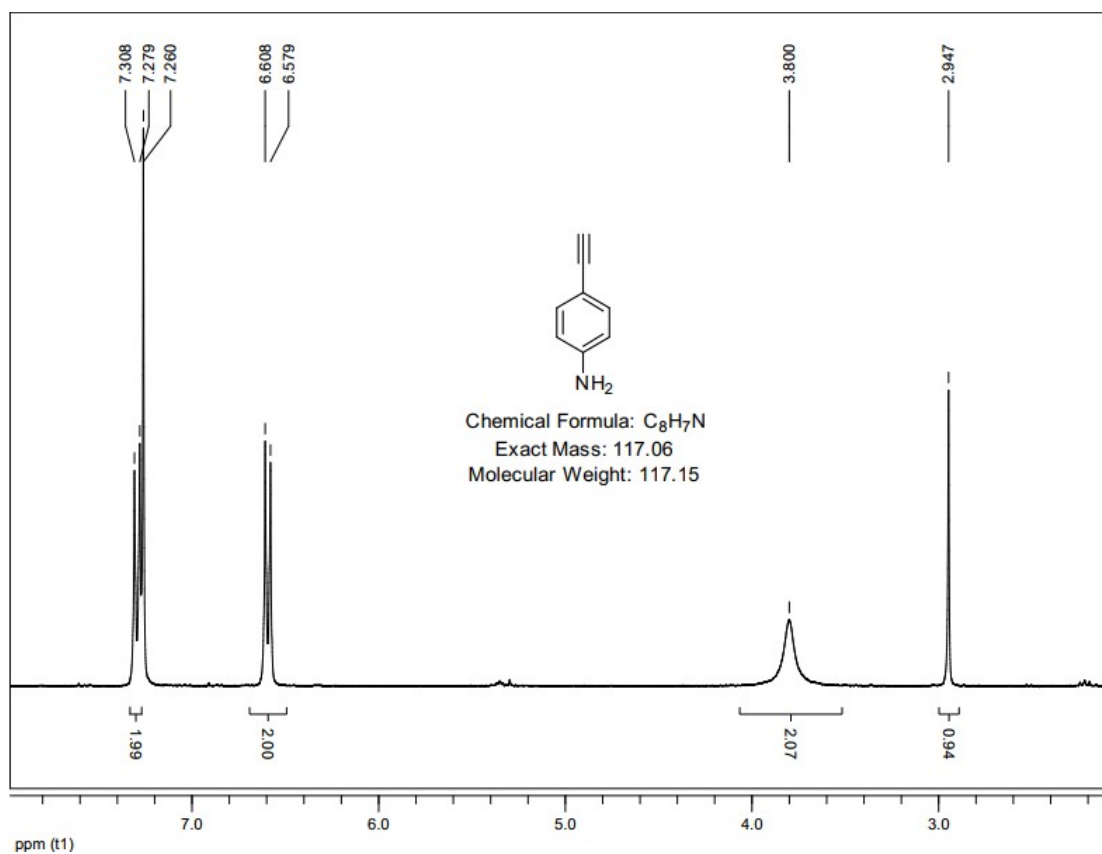

Figure S2 <sup>1</sup>H-NMR spectra of compound 2(CDCl<sub>3</sub>, 300 M)

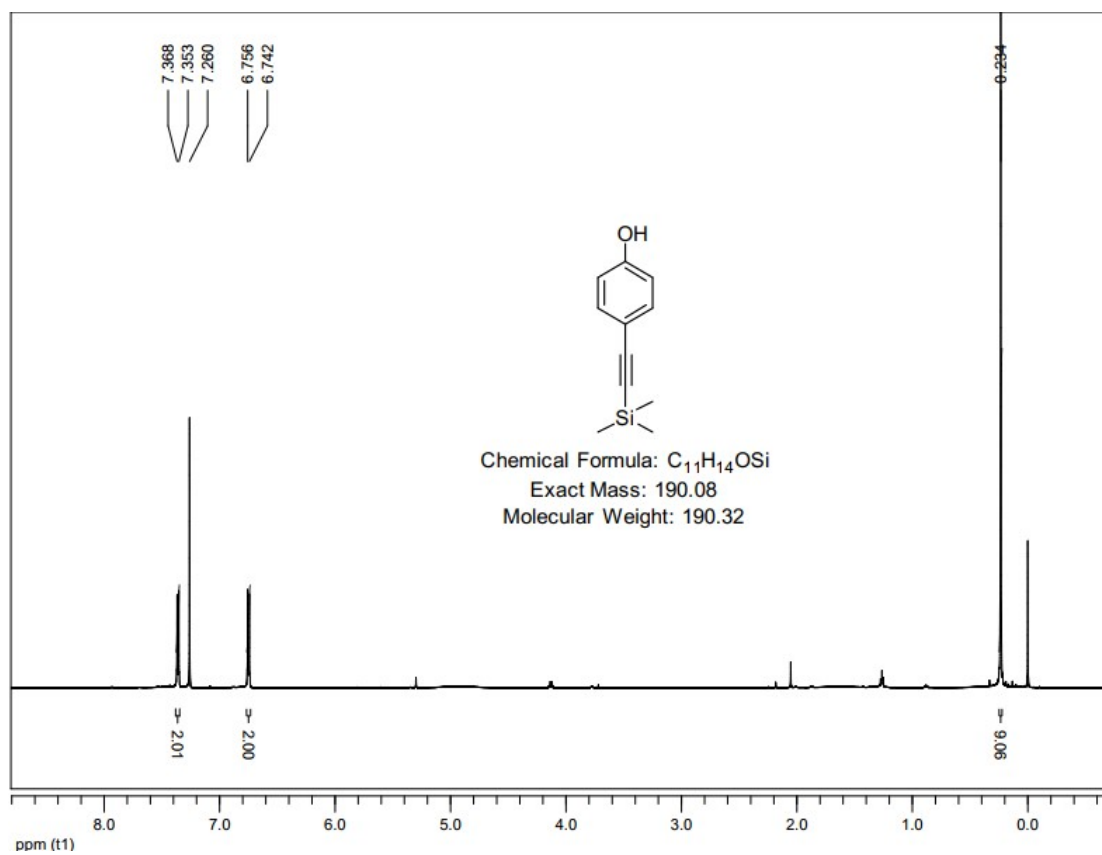

Figure S3 <sup>1</sup>H-NMR spectra of compound 3(CDCl<sub>3</sub>, 600 M)

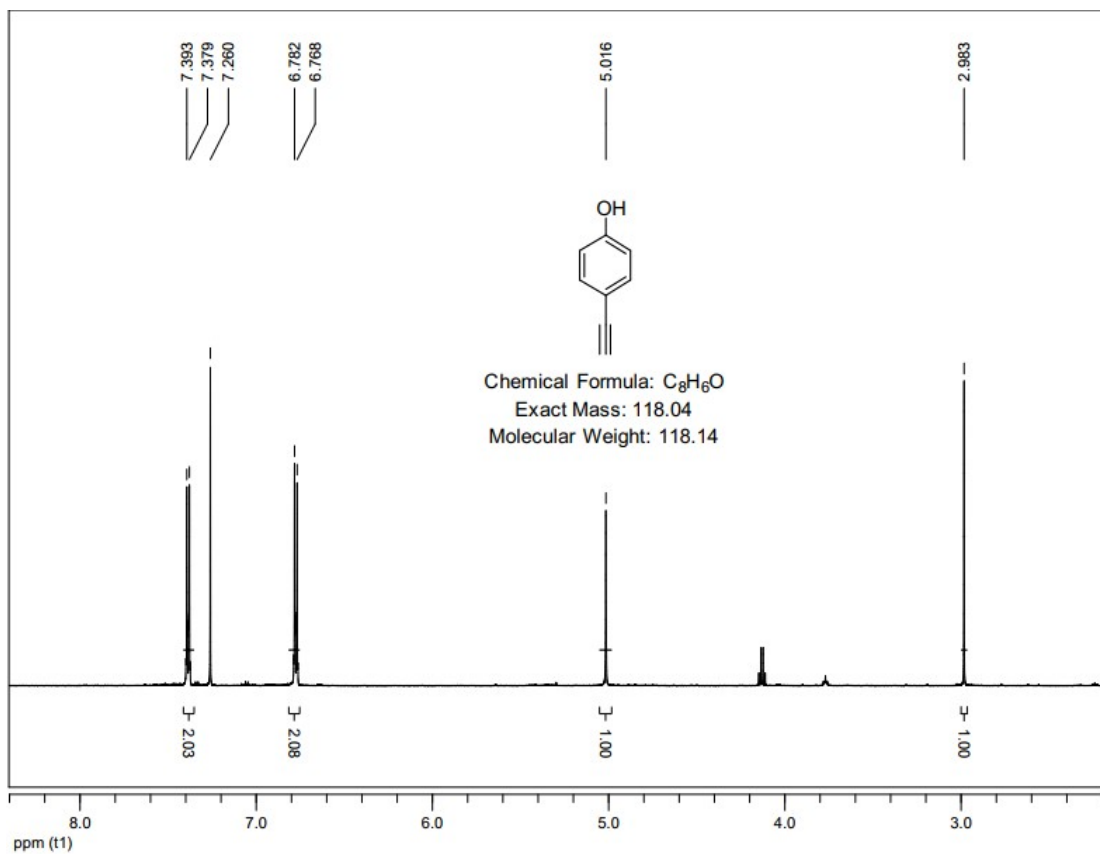

Figure S4 <sup>1</sup>H-NMR spectra of compound 4(CDCl<sub>3</sub>, 600 M)

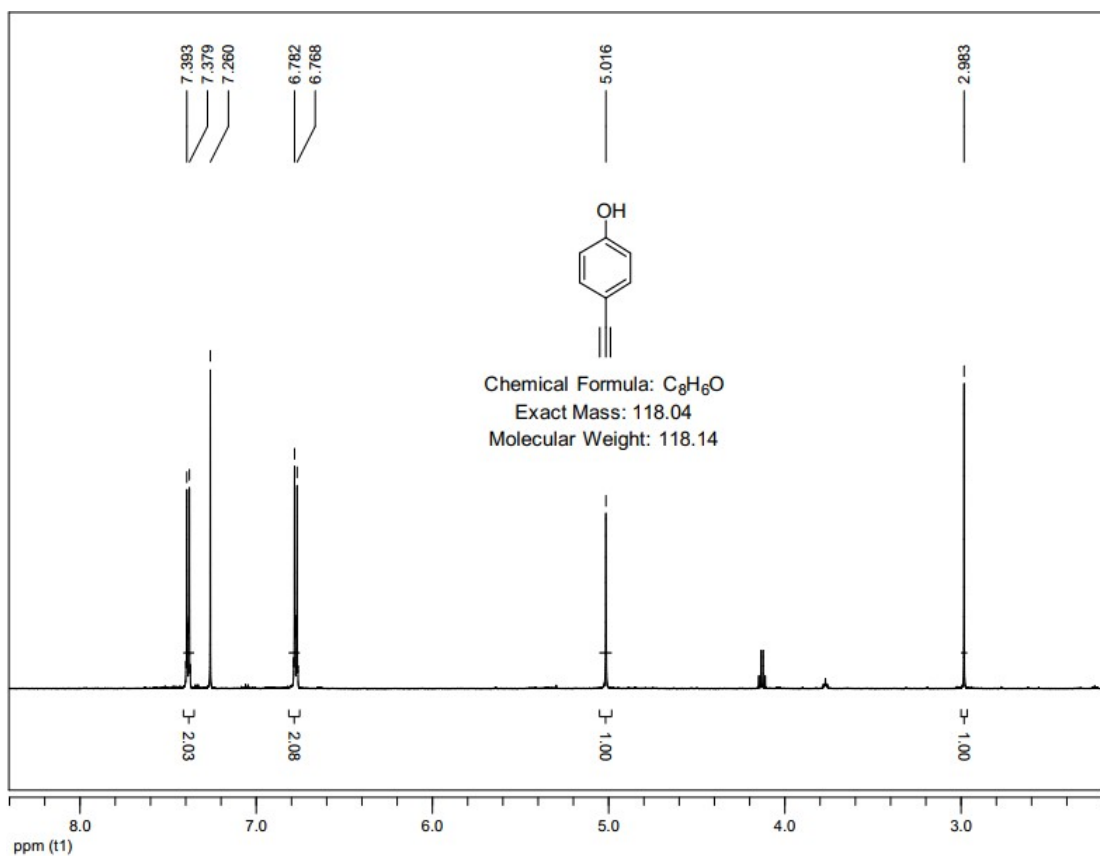

Figure S5 <sup>1</sup>H-NMR spectra of compound 4 (CDCl<sub>3</sub>, 600 M)

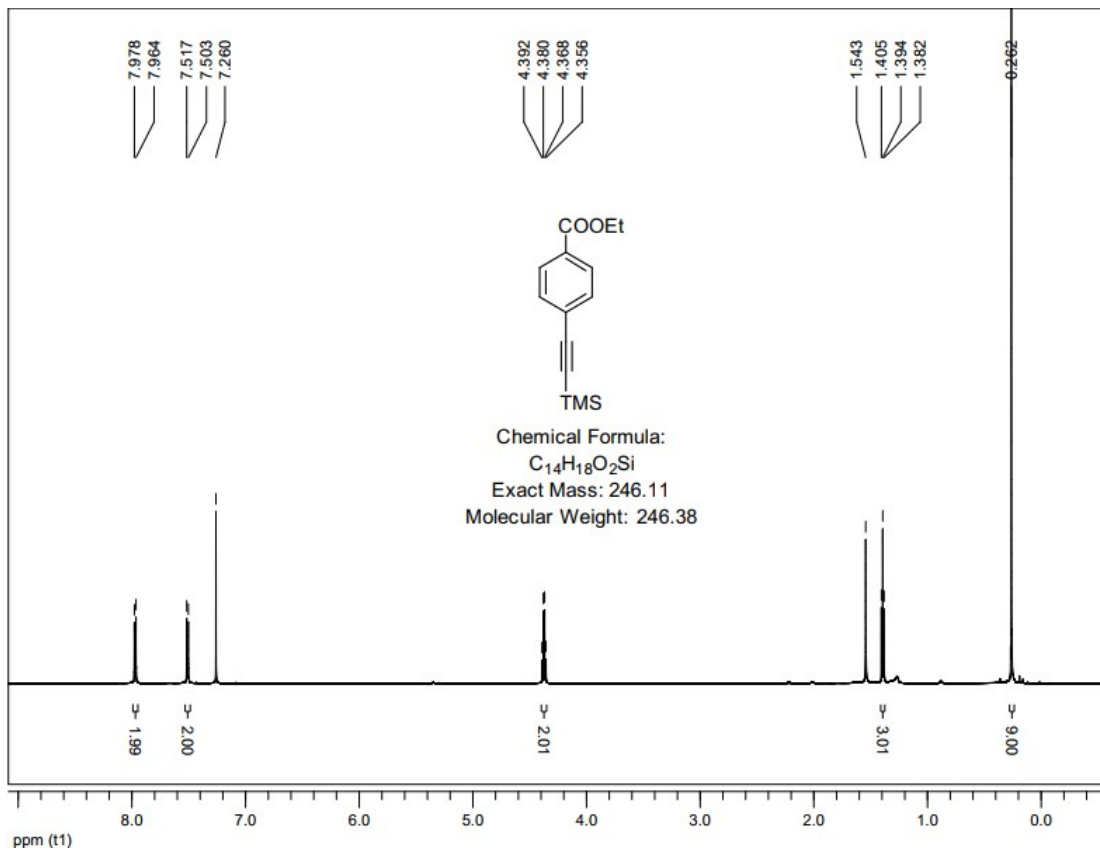

Figure S6  $^1H$ -NMR spectra of compound **5** ( $CDCl_3$ , 600 M)

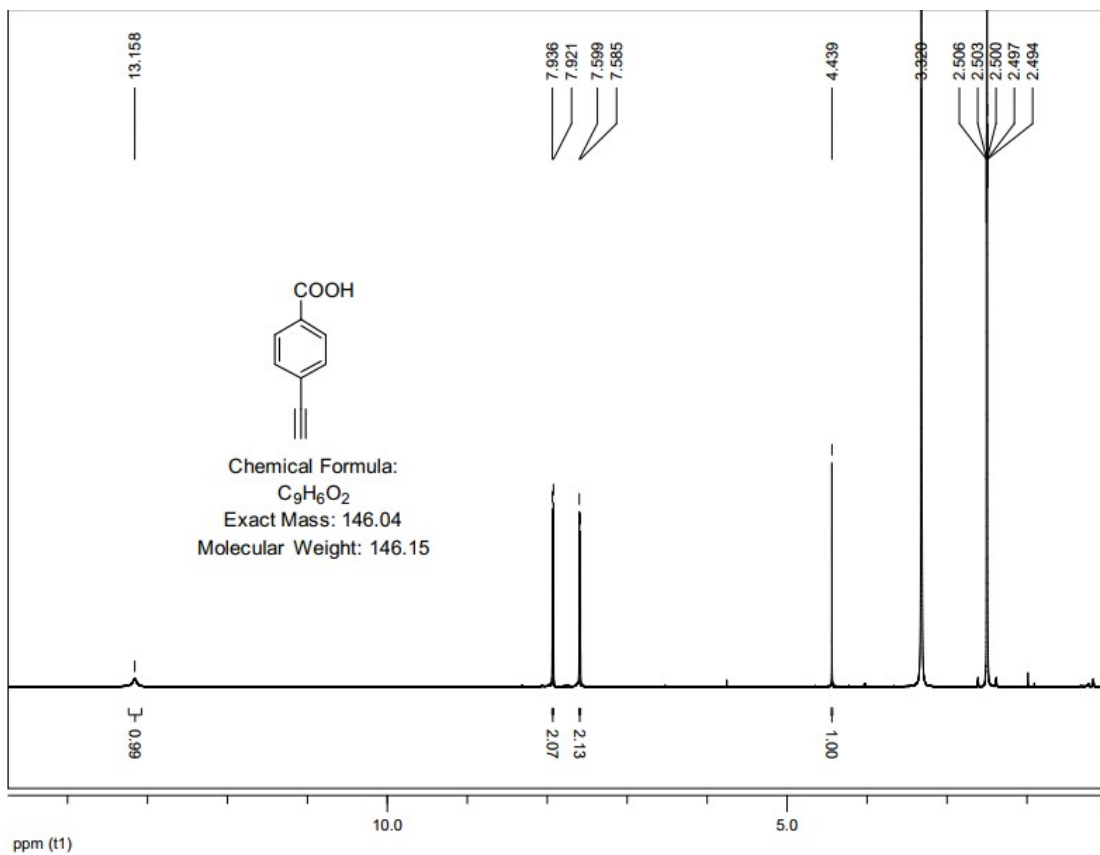

Figure S7  $^1H$ -NMR spectra of compound **6** ( $DMSO-D_6$ , 600 M)

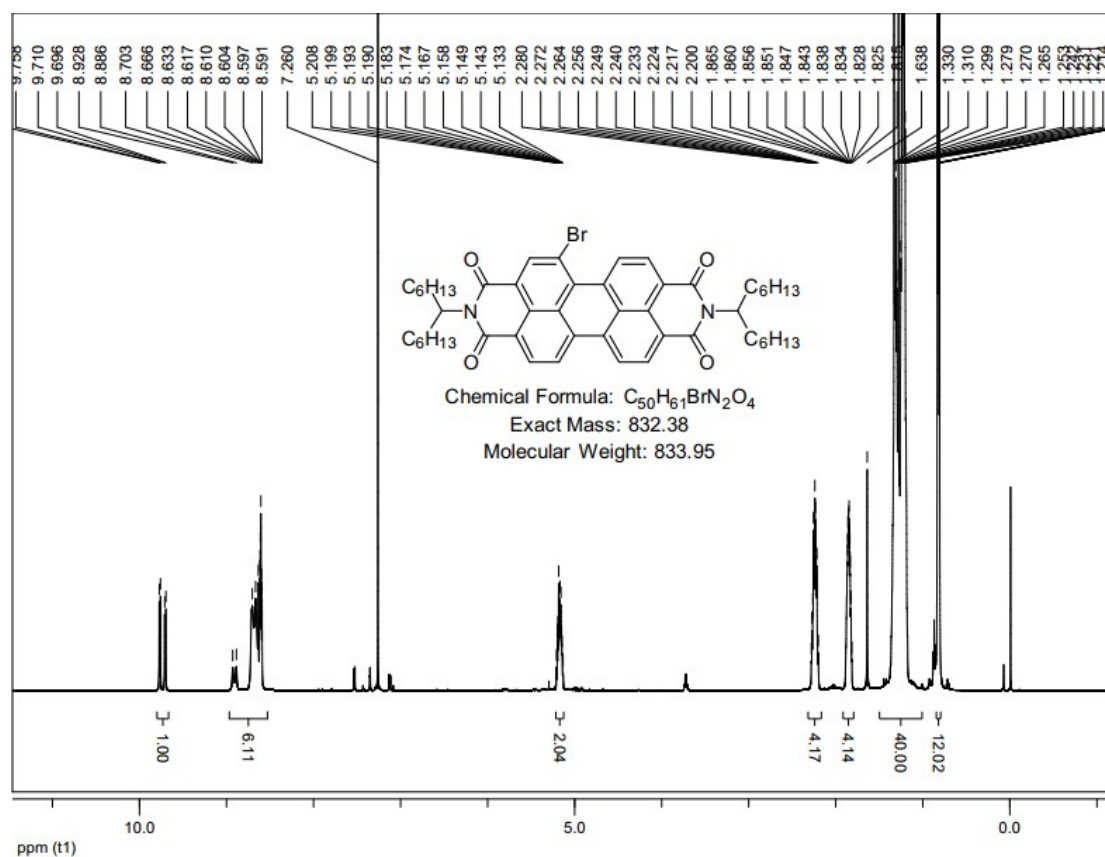

Figure S8  $^1H$ -NMR spectra of **PDI-Br** ( $CDCl_3$ , 600 M)

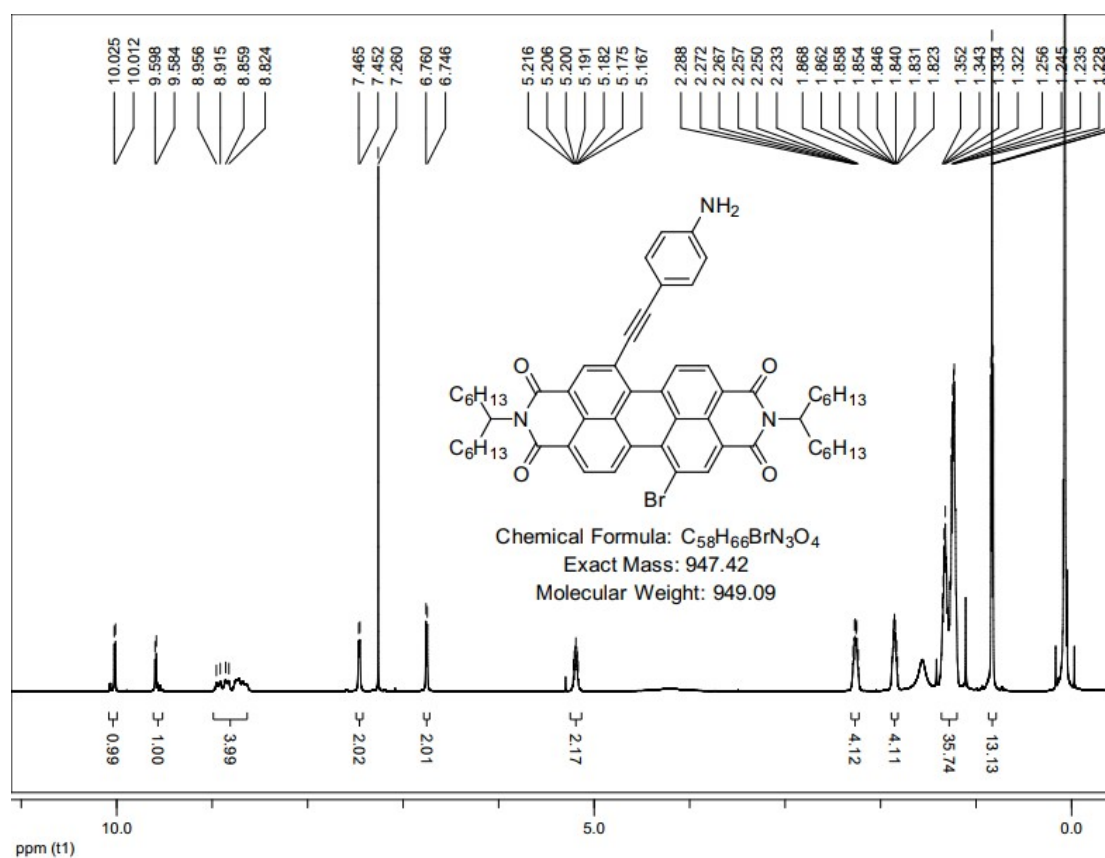

Figure S9  $^1H$ -NMR spectra of **PDI-NH<sub>2</sub>** ( $CDCl_3$ , 600 M)

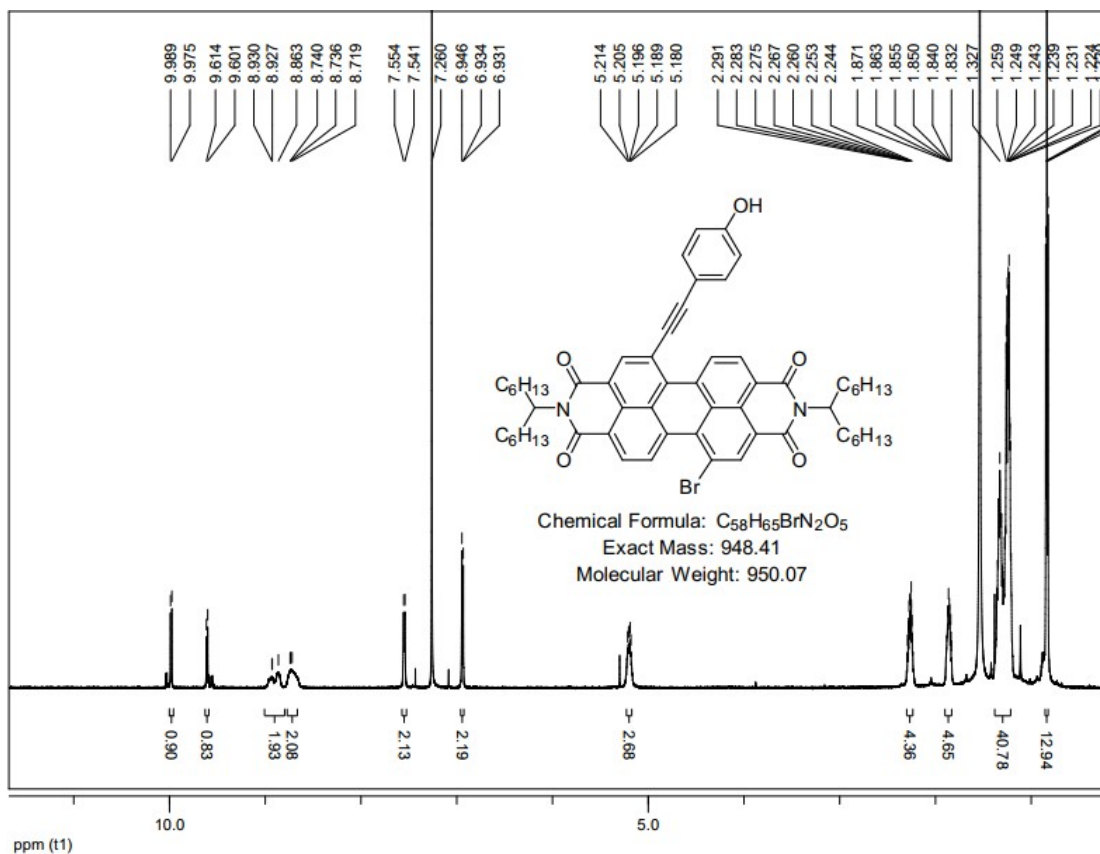

Figure S10  $^1H$ -NMR spectra of **PDI-OH** ( $CDCl_3$ , 600 M)

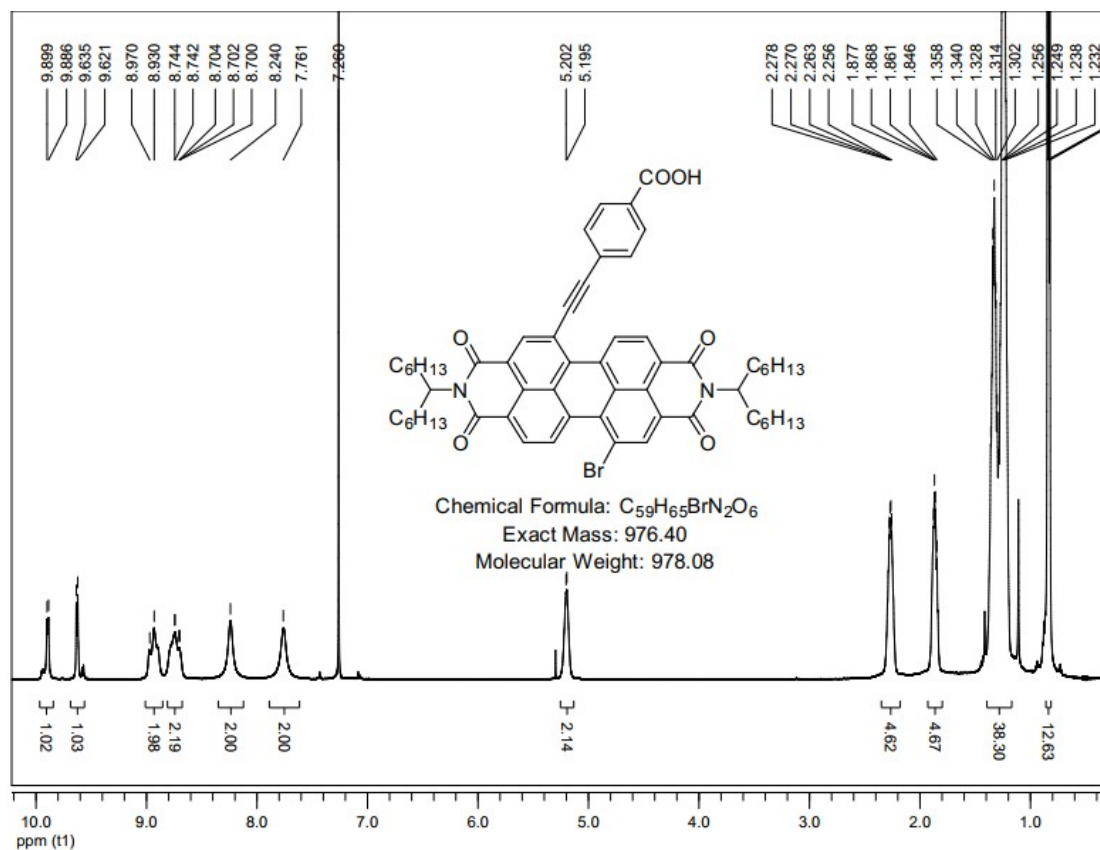

Figure S11  $^1H$ -NMR spectra of **PDI-COOH** ( $CDCl_3$ , 600 M)

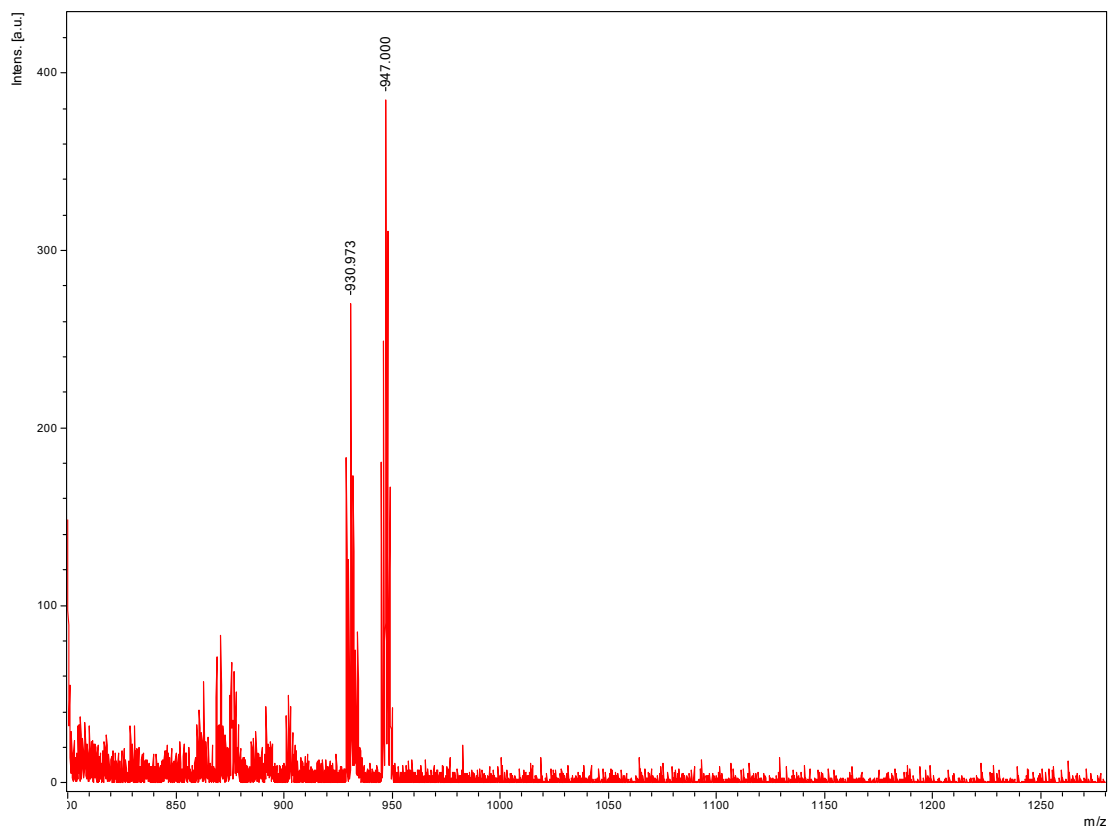

Figure S12 MALDI-TOF spectra of **PDI-NH<sub>2</sub>**

TJY-948\_180921102239 #217 RT: 1.72 AV: 1 NL: 4.57E6  
T: FTMS - p ESI Full ms [500.00-2000.00]

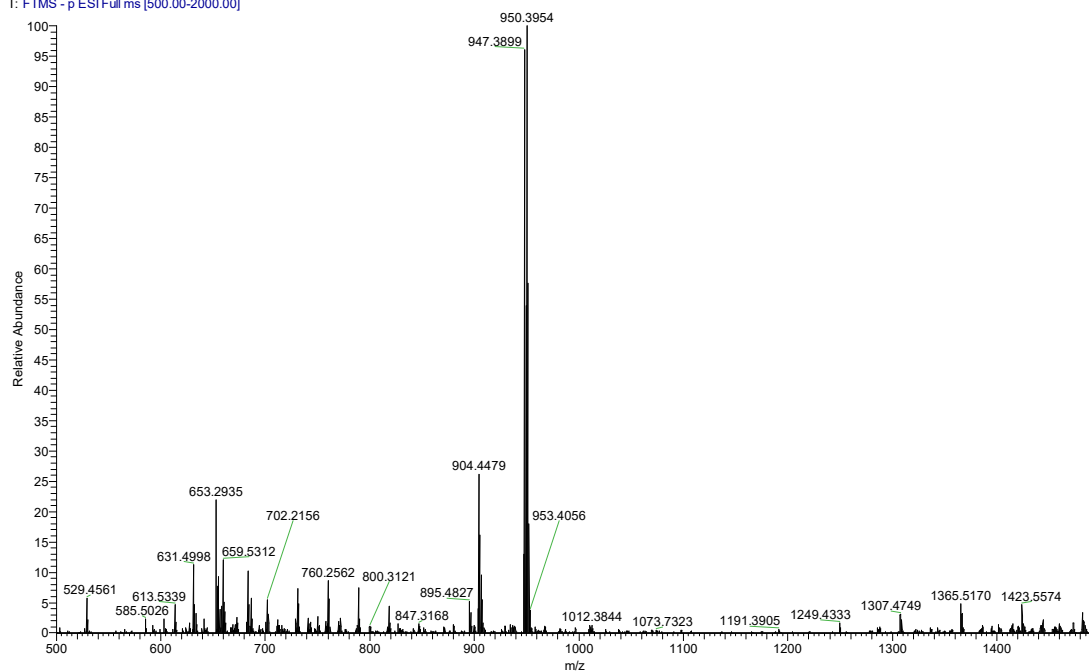

Figure S13 HRMS spectra of **PDI-OH**

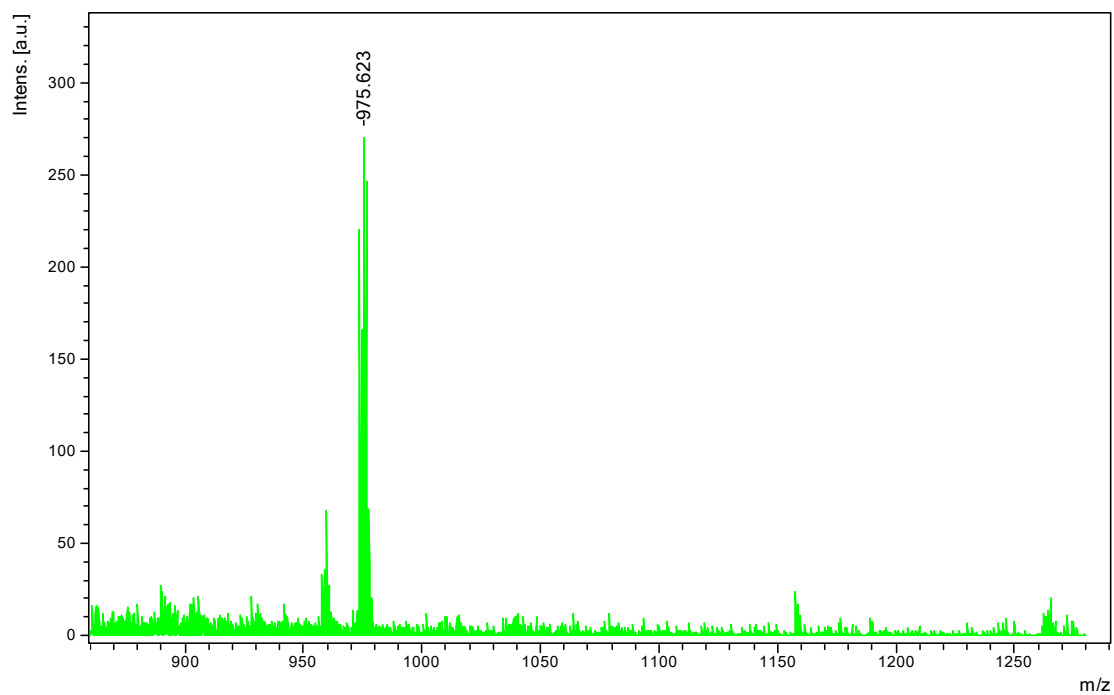

Figure S14 MALDI-TOF spectra of **PDI-COOH**

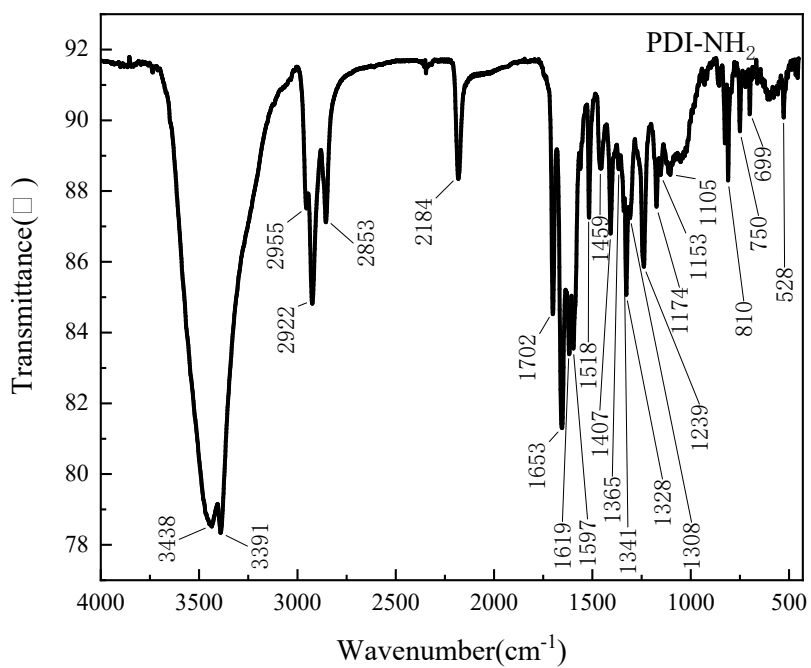

Figure S15. FT-IR spectra of **PDI-NH<sub>2</sub>**



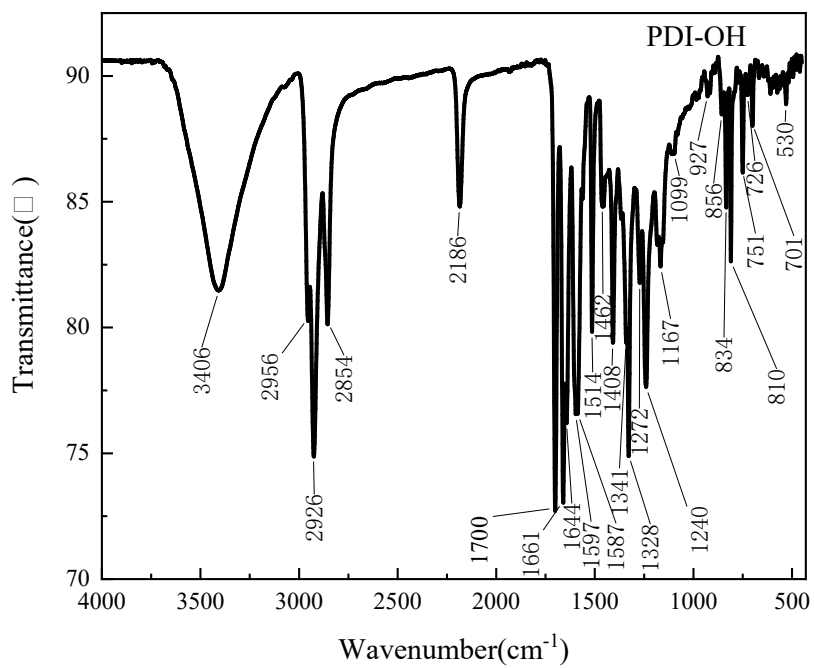

Figure S15. FT-IR spectra of **PDI-OH**

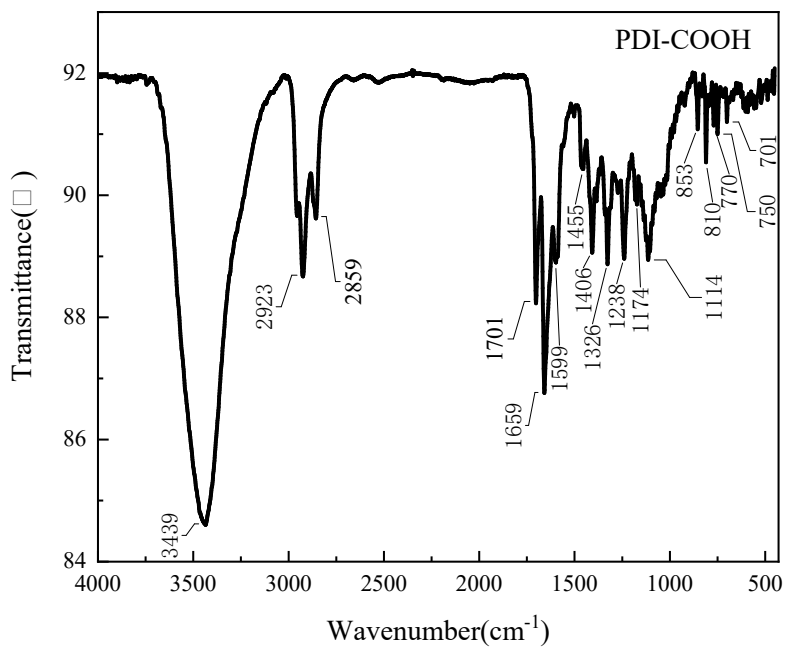

Figure S15. FT-IR spectra of **PDI-COOH**

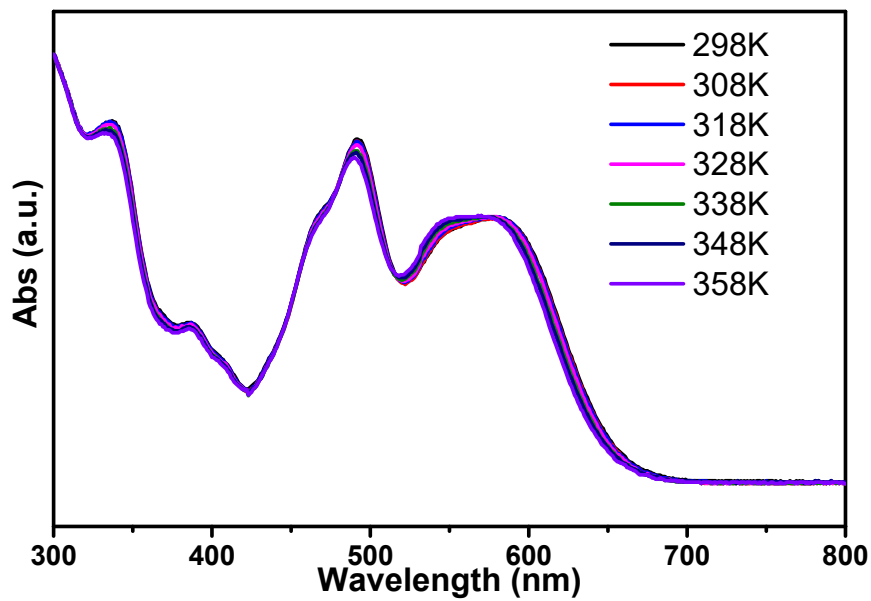

Figure S16. Temperature-dependent UV-vis spectra of **PDI-NH<sub>2</sub>** in toluene ( $1 \times 10^{-5}$  mol/L)

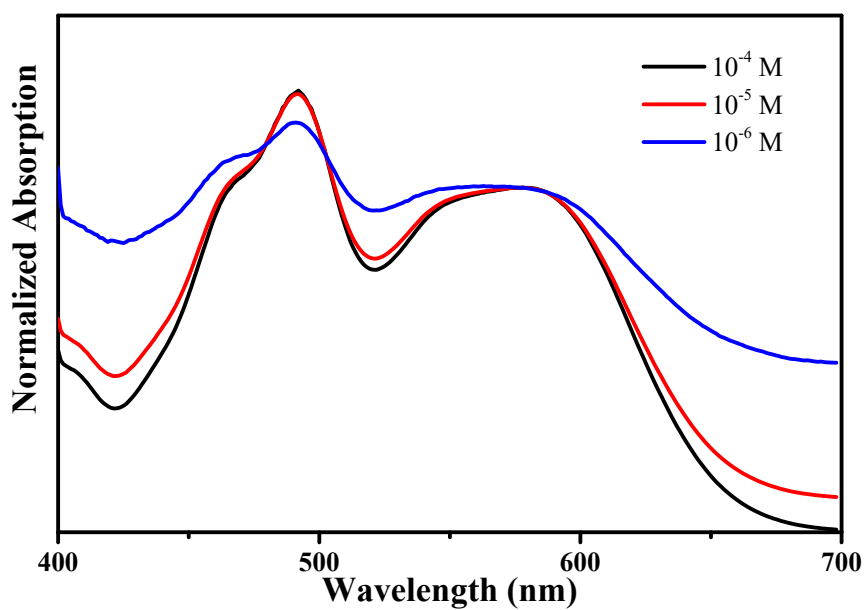

Figure S17. Concentration-dependent UV-vis spectra of **PDI-NH<sub>2</sub>** in toluene

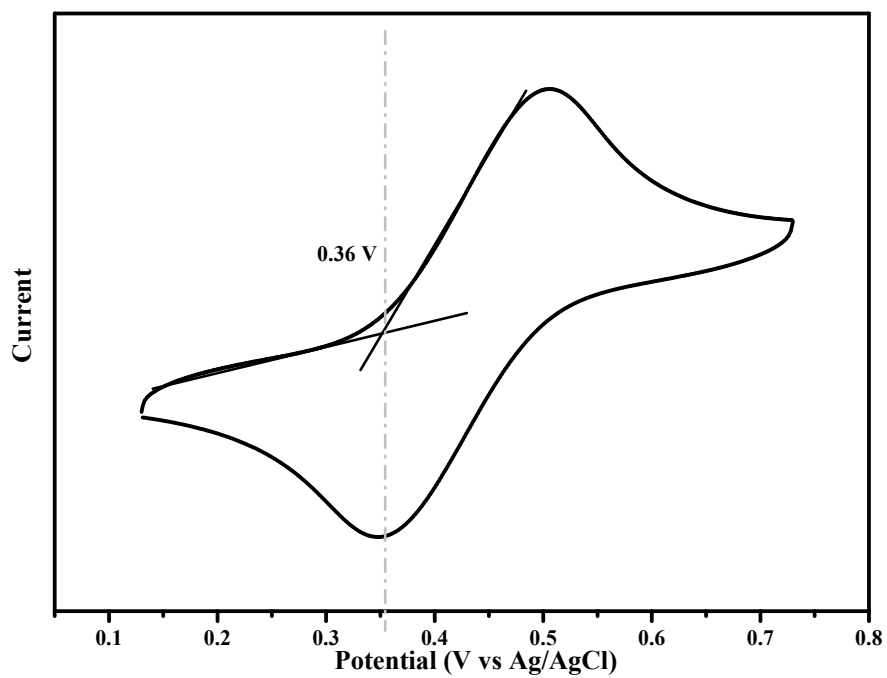

Figure S18. Cyclic voltammograms of Fc /Fc<sup>+</sup> vs Ag/AgCl in CH<sub>2</sub>Cl<sub>2</sub> containing 0.1 M TBAPF<sub>6</sub> at a scan rate of 0.1 V/s

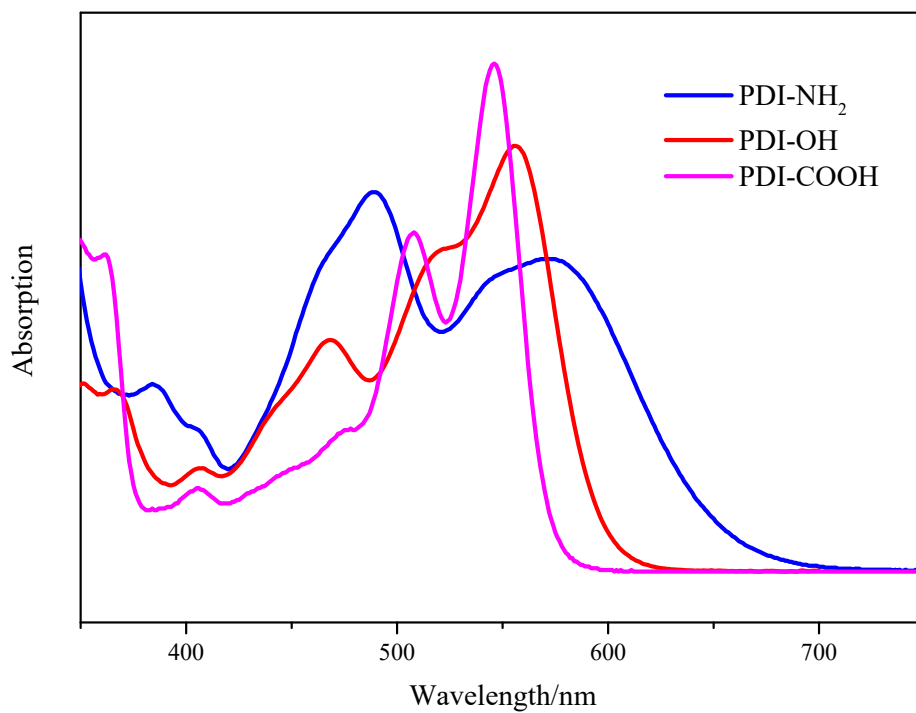

Figure S19. Absorption spectra of **PDI-NH<sub>2</sub>**, **PDI-OH** and **PDI-COOH** in CH<sub>2</sub>Cl<sub>2</sub>
